# Supplementary material
Source: Springer Nature journal article supplement (https://www.springermedizin.de/resource/supplementary/12958_2012_983_MOESM1_ESM.pdf/9566560)
Supplement: MOESM1 [file 9566560]

**A**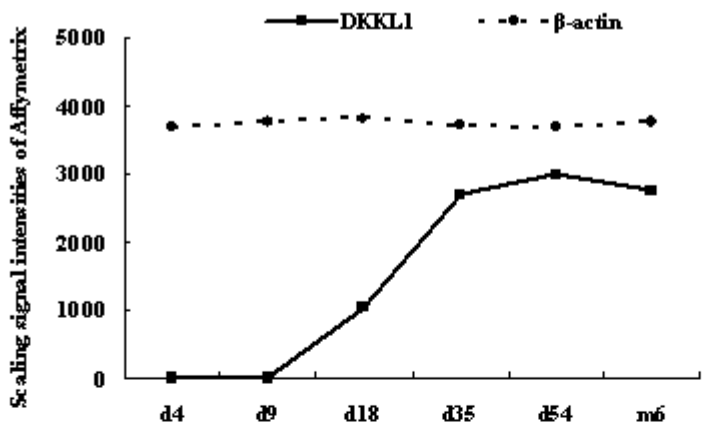

Testis isolated from different postnatal days of Balb/C mice

**B**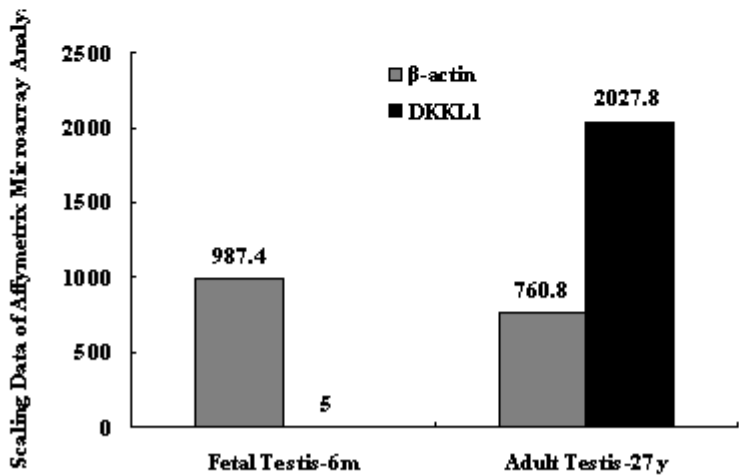

Affymetrix gene microarray study on human fetal testis and adult testis
